# Supplementary material for: Swift catalytic reduction of hazardous pollutants by new generation microgels
Source: Royal Society of Chemistry journal article supplement (doi:10.1039/d1sm01559a), 2021-11-29
Supplement: d1sm01559a3.pdf [file d1sm01559a3.pdf]

## Swift catalytic reduction of hazardous pollutants by new generation microgels

Vinai Kumar Singh<sup>a</sup>, Krishna Kumar<sup>\*a</sup>, Nishant Singh<sup>b</sup>, Rudramani Tiwari<sup>c</sup> and S. Krishnamoorthi<sup>c</sup>

<sup>a</sup>Department of Chemistry & Environmental Science, Madan Mohan Malaviya University of Technology, Gorakhpur-273010, U.P., INDIA

<sup>b</sup>Department of Chemistry, Faculty of science, Tilak Manjhi Bhagalpur University, Bhagalpur-812007, Bihar, INDIA

<sup>c</sup>Department of Chemistry, Institute of Science, Banaras Hindu University, Varanasi-221005, U.P., INDIA

\*Corresponding Author's Email id: [neerajrab@gmail.com](mailto:neerajrab@gmail.com)

---

### Supplementary Materials

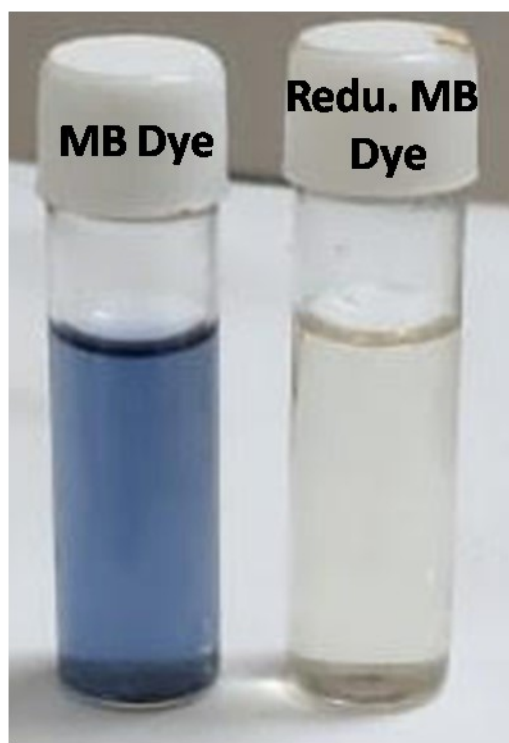

**S 1:** Methylene blue dye images of before and after catalytic reduction by microgels.

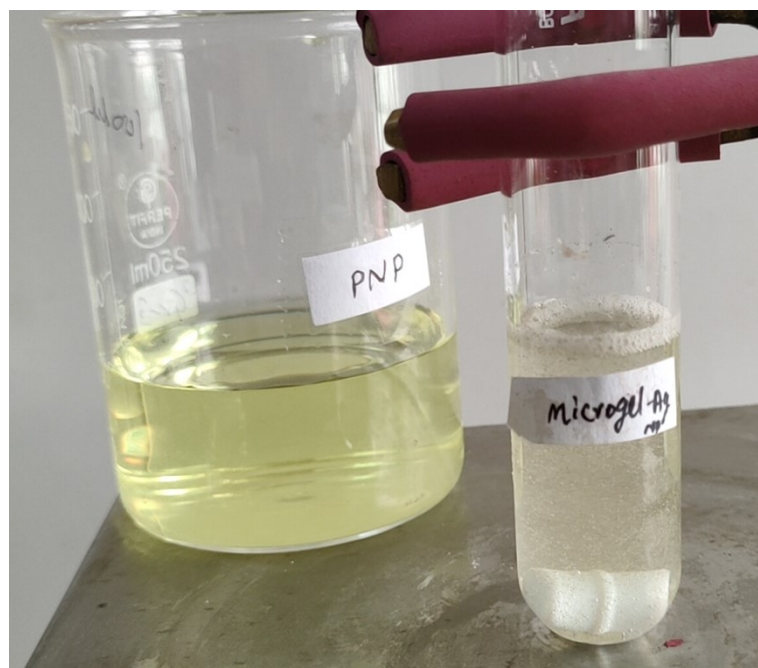

**S 2:** P-nitro phenol images of before and after catalytic reduction by microgels.

### **XRD**

XRD analysis of G1 and G1\_Ag composite was performed by 18 kW Cu-rotating anode RIGAKU Minifex 600 (Tokyo, Japan) and the scattering angle ( $2\theta$ ) was varied from 5 to 70°

In XRD analysis of microgel no crystalline peak was observed, only one hump was depicted at 19.44° ( $2\theta$  value). So, microgel is amorphous in nature. In composites, the characteristic Ag NPs planes (111), (200), (220) and (311) was observed at  $2\theta$  value of 36.27, 48.05, 69.14 and 75.46 respectively. The asterisk marks attributed as undefined peaks. It indicates, the silver nanoparticles were belonging to FCC arrangement and crystalline in nature.<sup>1</sup> The broadening of Bragg's peaks were confirmed that formation and successfully stabilization of NPs in microgel. The average size of silver nanoparticles was calculated by using the Debye–Scherrer's equation:

$$D = 0.94\lambda/\beta\cos\theta$$

Where  $D$  is the average crystallite domain size perpendicular to the reflecting planes,  $\lambda$  is the X-ray wavelength,  $\beta$  is the full width at half maximum (FWHM), and  $\theta$  is the diffraction angle. It is found that the calculated average size is 17.82 nm from FWHM of peaks. XRD graph of microgel and composite is shown in Fig. S3.<sup>2</sup>

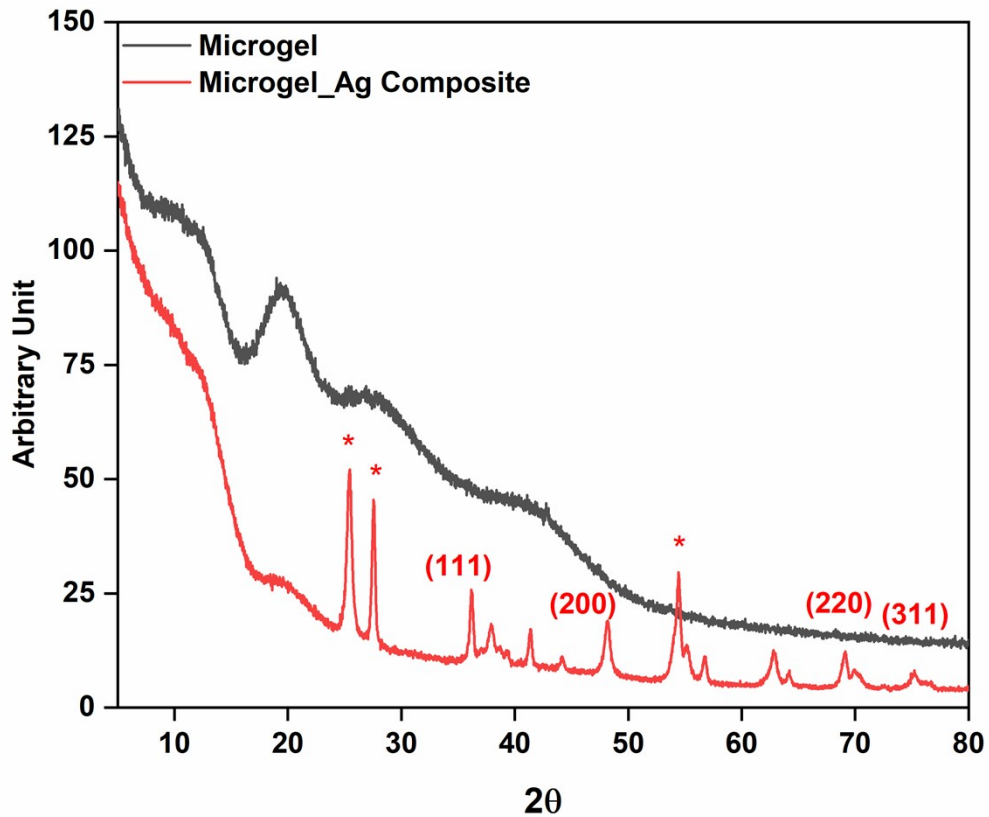

Fig. S 3: XRD graph of microgel and microgel\_Ag composite.

## References

1. R. Begum, J. Najeeb, G. Ahmad, W. Wu, A. Irfan, A. G. Al-Sehemi and Z. H. Farooqi, *React. Funct. Polym.*, 2018, 132, 89-97.
2. T. C. Prathna, N. Chandrasekaran, A. M. Raichur and A. Mukherjee, *Colloids Surf. B: Biointerf.*, 2011, 82(1), 152-159.
